# Supplementary material for: Functional morphology of tarsal adhesive pads and attachment ability in ticksIxodes ricinus(Arachnida, Acari, Ixodidae)
Source: Oxford University Press journal article supplement (doi:10.1242/jeb.152942), 2017-05-31
Supplement: jeb152942supp.pdf [file jeb152942supp.pdf]

**Table S1.****Wettability and free surface energy of test substrates.**

The contact angle measuring device OCAH200 and SCA20 3.7.4 software (Data-Physics Instruments GmbH, Filderstadt, Germany) were used to estimate the wettability of test substrates by contact angle (CA) measurements. The free surface energy (FSE), its polar (p) and disperse (d) portions were calculated. For detailed description of the method see [Voigt and Gorb \(2010\)](#).

| Substrate                                              | FSE                       | Polar component          | Disperse component       | CA of Aqua millipore water |
|--------------------------------------------------------|---------------------------|--------------------------|--------------------------|----------------------------|
| <u>Substrates used in inversion and traction tests</u> |                           |                          |                          |                            |
| Glass                                                  | 52.4 mN mm <sup>-1</sup>  | 36.5 mN mm <sup>-1</sup> | 15.9 mN mm <sup>-1</sup> | 39.3°                      |
| Silicone                                               | 7.2 mN mm <sup>-1</sup>   | 0.5 mN mm <sup>-1</sup>  | 6.8 mN mm <sup>-1</sup>  | 123°                       |
| Spurr resin                                            | 27.2 mN mm <sup>-1</sup>  | 4.0 mN mm <sup>-1</sup>  | 23.2 mN mm <sup>-1</sup> | 91.3°                      |
| Native skin*                                           | 25-29 mN mm <sup>-1</sup> | 10.8 mN mm <sup>-1</sup> | 16.2 mN mm <sup>-1</sup> | 80-110°                    |
| <u>Substrates used in centrifugal force test</u>       |                           |                          |                          |                            |
| Normal glass                                           | 52.0 mN mm <sup>-1</sup>  | 34.6 mN mm <sup>-1</sup> | 17.4 mN mm <sup>-1</sup> | 42°                        |
| Silanized glass                                        | 11.4 mN mm <sup>-1</sup>  | 1.8 mN mm <sup>-1</sup>  | 9.6 mN mm <sup>-1</sup>  | 108°                       |

\*according to [Ginn et al. \(1968\)](#); [Czech et al. \(2011\)](#); [Persson et al. \(2013\)](#)

**References**

- Czech, Z., Kowalczyk, A. and Swiderska, J.** (2011). Pressure-sensitive adhesives for medical applications. In *Wide Spectra of Quality Control* (ed. I. Akyar), pp. 1-25. Intechopen. doi:10.5772/23827.
- Ginn, M. E., Noyes, C. M. and Jungermann, E.** (1968). The contact angle of water on viable human skin. *J. Colloid Interface Sci.* **26**, 146-51. doi:10.1016/0021-9797(68)90306-8.
- Persson, B. N. J., Kovalev, A. and Gorb, S. N.** (2013). Contact mechanics and friction on dry and wet human skin. *Tribol. Lett.* **50**, 17-30. doi:10.1007/s11249-012-0053-2.
- Voigt, D. and Gorb, S.** (2010). Egg attachment of the asparagus beetle *Crioceris asparagi* to the crystalline waxy surface of *Asparagus officinalis*. *Proc. R. Soc. B* **277**: 895-903. doi:10.1098/rspb.2009.1706.

**Table S2.**Mean length and width [ $\mu\text{m}$ ] of leg segments and total legs,  $n=2$  per leg number.

| Sex      | Podomere                | L IV          |        | L III         |        | L II          |        | L I           |        | Pooled mean   |               |
|----------|-------------------------|---------------|--------|---------------|--------|---------------|--------|---------------|--------|---------------|---------------|
|          |                         | Length        | Width         |
| <b>F</b> | Coxa                    | 333.86        | 277.84 | 363.29        | 245.13 | 349.54        | 196.31 | 350.28        | 201.26 | <b>349.24</b> | <b>230.14</b> |
| <b>E</b> | Trochanter              | 347.43        | 157.44 | 266.57        | 169.32 | 228.82        | 162.00 | 209.47        | 176.78 | <b>263.07</b> | <b>166.38</b> |
| <b>M</b> | Femur                   | 590.99        | 135.46 | 418.27        | 155.08 | 373.6         | 145.08 | 494.45        | 161.09 | <b>469.33</b> | <b>149.18</b> |
| <b>A</b> | Patella                 | 548.62        | 156.07 | 454.52        | 170.93 | 381.84        | 145.48 | 486.84        | 162.41 | <b>467.96</b> | <b>158.73</b> |
| <b>L</b> | Tibia                   | 450.39        | 133.78 | 370.08        | 162.41 | 361.31        | 143.27 | 425.99        | 154.66 | <b>401.94</b> | <b>148.53</b> |
| <b>E</b> | Tarsus                  | 657.74        | 107.32 | 561.74        | 126.70 | 490.68        | 127.22 | 728.01        | 144.28 | <b>609.54</b> | <b>126.38</b> |
|          | <b>Total leg length</b> | <b>2929.0</b> |        | <b>2434.5</b> |        | <b>2185.8</b> |        | <b>2695.0</b> |        | <b>2561.1</b> |               |
|          | Mean leg width          |               | 161.3  |               | 171.6  |               | 153.2  |               | 166.8  |               | 163.2         |
| <b>M</b> | Coxa                    | 138.13        | 300.78 | 149.33        | 252.19 | 162.08        | 189.03 | 215.05        | 200.67 | <b>166.15</b> | <b>235.67</b> |
| <b>A</b> | Trochanter              | 140.34        | 267.09 | 179.60        | 162.79 | 120.14        | 138.91 | 178.22        | 147.38 | <b>154.57</b> | <b>179.04</b> |
| <b>L</b> | Femur                   | 183.33        | 156.94 | 313.59        | 120.25 | 270.02        | 120.10 | 395.83        | 144.14 | <b>290.69</b> | <b>135.36</b> |
| <b>E</b> | Patella                 | 277.14        | 136.56 | 357.21        | 146.13 | 272.49        | 144.35 | 361.79        | 158.80 | <b>317.16</b> | <b>146.46</b> |
|          | Tibia                   | 421.21        | 107.63 | 256.54        | 124.14 | 230.11        | 133.31 | 324.61        | 149.90 | <b>308.12</b> | <b>128.75</b> |
|          | Tarsus                  | 399.07        | 140.30 | 442.61        | 112.02 | 385.79        | 129.72 | 625.90        | 135.65 | <b>463.34</b> | <b>129.42</b> |
|          | <b>Total leg length</b> | <b>1559.2</b> |        | <b>1698.9</b> |        | <b>1440.6</b> |        | <b>2101.4</b> |        | <b>1700.0</b> |               |
|          | Mean leg width          |               | 184.9  |               | 152.9  |               | 142.6  |               | 156.1  |               | 159.1         |

**Table S3.**

Area of the pad [ $\mu\text{m}^2$ ] in contact with a glass slide, while tick is attached to the ceiling. Data on left and right legs are pooled together (mean $\pm$ standard deviation). Asterisks: statistical differences between unfolded and folded pads for a single leg. Lower case letters: statistical differences between legs I-IV at the same condition (single row). Upper case letters: statistical differences between male and female for a single leg at the same condition.

| Leg no.       | I                           | II                              | III                             | IV                             |
|---------------|-----------------------------|---------------------------------|---------------------------------|--------------------------------|
| <b>Male</b>   |                             |                                 |                                 |                                |
| Unfolded      | 6902.0 $\pm$ 1304.28<br>A   | 6581.5 $\pm$ 285.59<br>*, A     | 6348.0 $\pm$ 231.61<br>*, A     | 6837.8 $\pm$ 527.09<br>*, A    |
| Expanded      | 18972.6 $\pm$ 294.66<br>a   | 10050.6 $\pm$ 186.64<br>b, *    | 9485.9 $\pm$ 1436.81<br>b, *, A | 8885.4 $\pm$ 1616.18<br>b, *   |
| <b>Female</b> |                             |                                 |                                 |                                |
| Unfolded      | 10054.4 $\pm$ 58.75<br>a, B | 9090.9 $\pm$ 851.24<br>ab, *, B | 7462.8 $\pm$ 683.55<br>b, *, B  | 9338.5 $\pm$ 842.06<br>a, *, B |
| Expanded      | 25237.6 $\pm$ 10511.56<br>a | 13006.1 $\pm$ 1234.18<br>ab, *  | 11486.1 $\pm$ 178.62<br>b, *, B | 10847.8 $\pm$ 514.72<br>b, *   |

Further results of statistical processing.

Male: expanded pad, differences between legs (one-way ANOVA,  $F_{3,9}=56.2$ ,  $P<0.001$ , followed by all pairwise multiple comparison procedure Dunn's test,  $P<0.05$ ); unfolded vs. unexpanded, leg II ( $t$ -test,  $t=-346$ ,  $P\leq 0.001$ ), leg III ( $t$ -test,  $t=-6.2$ ,  $P\leq 0.001$ ), leg IV ( $t$ -test,  $t=-2.8$ ,  $P=0.047$ ).

Female: unfolded pad, differences between legs (one-way ANOVA,  $F_{3,21}=5.6$ ,  $P=0.006$ , followed by all pairwise multiple comparison procedure Dunn's test,  $P<0.05$ ); expanded pad, differences between legs (Kruskal-Wallis one-way ANOVA on ranks,  $H_{3,34}=13.4$ ,  $P=0.004$ , followed by all pairwise multiple comparison procedure Dunn's test,  $P<0.05$ ); unfolded vs. unexpanded condition, leg II ( $t$ -test,  $t=-3.7$ ,  $P=0.002$ ), leg III ( $t$ -test,  $t=-7.7$ ,  $P<0.001$ ), leg IV (Mann-Whitney rank sum test,  $T=58$ ,  $P=0.022$ ).

Male vs. female: leg I unfolded (Mann-Whitney rank sum test,  $T=21$ ,  $P=0.036$ ), leg II unfolded (Mann-Whitney rank sum test,  $T=34$ ,  $P=0.035$ ), leg III unfolded ( $t$ -test,  $t=2.6$ ,  $P=0.021$ ), leg IV unfolded ( $t$ -test,  $t=3.4$ ,  $P=0.020$ ), leg III expanded ( $t$ -test,  $t=3.0$ ,  $P=0.020$ ).

Area of the pads in contact, all legs pooled together,  
 unfolded: 26669  $\mu\text{m}^2$  in males, 35947  $\mu\text{m}^2$  in females;  
 expanded: 47395  $\mu\text{m}^2$  in males, 60578  $\mu\text{m}^2$  in females.

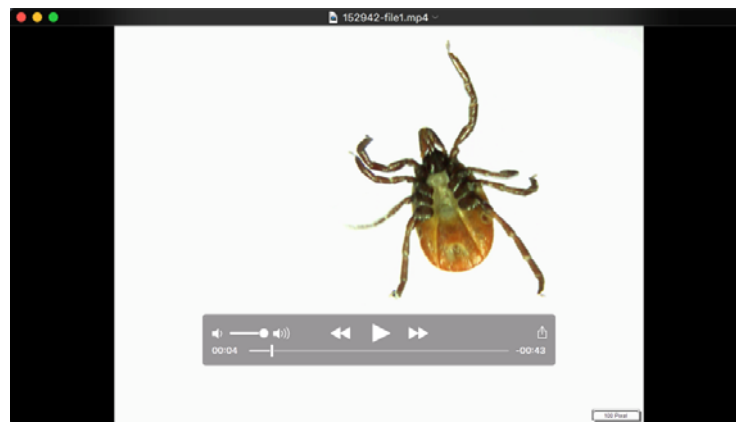

### Movie 1.

Females of *Ixodes ricinus* walking on the glass ceiling. Pads while getting in contact and detachment are visible; 3.3 times decelerated.

1<sup>st</sup> sequence: A female walking on a glass surface at ceiling position.

2<sup>nd</sup> sequence: Attachment and detachment of translucent adhesive pads during locomotion are visible. The totally expanded adhesive pad of a second leg in contact with a glass surface while tick remained at ceiling position. The process of detachment of the pad is visualized.

3<sup>rd</sup> sequence: The folded adhesive pad of a foreleg in contact with a glass surface while tick remained at ceiling position. The process of detachment of the pad is visualized. After detachment, a residue of adhesion-mediating fluid is detectable.

4<sup>th</sup> sequence: The slightly unfolded adhesive pad of a hindleg in contact with a glass surface while tick remained at ceiling position. Tuning of attachment by alteration of the pad area is visible. By pulling the leg, the pad is more folded (claws fold together). By pushing the leg, the pad unfolds while its area increases (claws spread apart).
